# Supplementary material for: A variant of KCC2 from patients with febrile seizures impairs neuronal Cl− extrusion and dendritic spine formation
Source: PubMed Central journal article supplement — EMBO Rep. 2014 Mar 25;15(6):723–9. doi: 10.1002/embr.201438749 (PMC4197883; doi:10.1002/embr.201438749), 2014-03-25
Supplement: embr0015-0723-sd1.pdf [file embr0015-0723-sd1.pdf]

**Supplementary Table S1: Primer sequences used for the amplification of *SLC12A5***

| <b>Amplicon</b> | <b>Forward primer</b>        | <b>Reverse primer</b>        |
|-----------------|------------------------------|------------------------------|
| Exon 1          | 5'-GGAGAGCGAGACAGAGCTAC-3'   | 5'-TCTAACCCAGAGCTGCCTC-3'    |
| Exon 2          | 5'-TGTGGCTACACCACTGTATG-3'   | 5'-GAGAGAGCAGCTGATGAATC-3'   |
| Exon 3          | 5'-GAATAGTTTCGTGCTCCTTGTC-3' | 5'-TTCTTCCATTTCTCATCCCCCG-3' |
| Exon 4          | 5'-CGTAATGATGAGGACTGCAG-3'   | 5'-TCAGGTCTCATGCTTCCATC-3'   |
| Exon 5          | 5'-TATGGGGTATAAAGGCTTGGC-3'  | 5'-CTCTCTTGGGCCTTGATGTC-3'   |
| Exon 6          | 5'-CTCGCTGATAACCAGATTCTC-3'  | 5'-TGA CTGACAACCTGGGGTTC-3'  |
| Exon 7-1        | 5'-GCAAAGGGCTGCTGACTTAG-3'   | 5'-TGATGACCCAGCATAGATG-3'    |
| Exon 7-2        | 5'-TGTCAACAAGTTTGCCCTTG-3'   | 5'-CACACCACTCTGAGATTCTG-3'   |
| Exon 8          | 5'-AGCGAGGGCAAGGTTATGTG-3'   | 5'-ACCTACAATCCCTGCAGCGT-3'   |
| Exon 9          | 5'-TCCCCCTGAGCATTCTGTCT-3'   | 5'-AGGCAGAGTCTTCCCTCTCT-3'   |
| Exon 10         | 5'-TAGATCCCAGACTCACTGAC-3'   | 5'-CAGCAGGTAAGGCAGCAAGT-3'   |
| Exon 11         | 5'-ACTTGCTGCCTTACCTGCTG-3'   | 5'-CTGATGGGTCTGTTTCCCAG-3'   |
| Exon 12         | 5'TGGCATCTCCTGTCCACATC-3'    | 5'-GGTCACTGTGTGGTCTCTCT-3'   |
| Exon 13         | 5'-GGCTGAGAAATCCTTGAGGT-3'   | 5'-AGAGAAACACCCTGAACCAG-3'   |
| Exon 14         | 5'-TGCCCATGCTGTTGTTTCTG-3'   | 5'-GGATGGACTGGAGTAAGATG-3'   |
| Exon 15         | 5'-TGGGTCTCCCCACCTTGTCT-3'   | 5'-CTCATGACCCTTCCCTCTC-3'    |
| Exon 16         | 5'-GTGCAGTGTAGATGGTTCTC-3'   | 5'-TGAGCCTTGC ACTCATGCAC-3'  |
| Exon 17         | 5'-GTGTGTGGATGGTTGGTTAC-3'   | 5'-GTCTTCTAAGTGTCTCTGAC-3'   |
| Exon 18         | 5'-AGGCTGGTCCTTGTCTTTTC-3'   | 5'-AAGGAGCGGAAATCCAGTTC-3'   |
| Exon 19         | 5'-GAGTCACTGTTTCCCCCTCT-3'   | 5'-TACACTCACGCACACA ACTC-3'  |
| Exon 20         | 5'-GACCTTCTGAATCCCCTTC-3'    | 5'-GGTGTTAGAGTTGCCCTACT-3'   |
| Exon 21         | 5'-ACCTCATGCTTTCCTCCGTG-3'   | 5'-CAGCAGTTTGAGGCTCTCAG-3'   |
| Exon 22         | 5'-CTGGTGATAGCTCTTTGCAG-3'   | 5'-GGCAGTTGAGTCCTTTGGAG-3'   |
| Exon 23         | 5'-GCCTCAAAGGACTCAACTG-3'    | 5'-AGACCCTTTAGCTCACCCCA-3'   |
| Exon 24         | 5'-ACTCAGGGCAGATGACCATG-3'   | 5'-GAGGTCGTGGCACCAATTAG-3'   |
| Exon 25         | 5'-CTGGCTCCAATCTTCTCTAC-3'   | 5'-CAGGAACAGCTCAGCTCTTC-3'   |
| Exon 26-1       | 5'-GAAGGAGACCGGGTCTTTCT-3'   | 5'-GGGCACAGGGTCTGTATGTA-3'   |
