# Supplementary material for: A variant of KCC2 from patients with febrile seizures impairs neuronal Cl− extrusion and dendritic spine formation
Source: PubMed Central journal article supplement — EMBO Rep. 2014 Mar 25;15(6):723–9. doi: 10.1002/embr.201438749 (PMC4197883; doi:10.1002/embr.201438749), 2014-03-25

# Western blot membranes for Figure 2 (surface expression of KCC2)

Both membranes were cut twice horizontally (cut 1 at ~100kD; cut 2 at ~72 kD), as seen in the corresponding brightfield image.

The cutting lines are indicated as dashed lines in the chemiluminescence image on the right.

Membrane strips **a** were incubated with primary antibody against KCC2, strips **b** with primary antibody against TfR and membrane strips **c** with an antibody detecting tubulin.

Thus we could detect 3 different proteins from one membrane, without stripping the blot.

The lanes which are shown in Figure 2 are marked with a red line and label.

## Bright field image

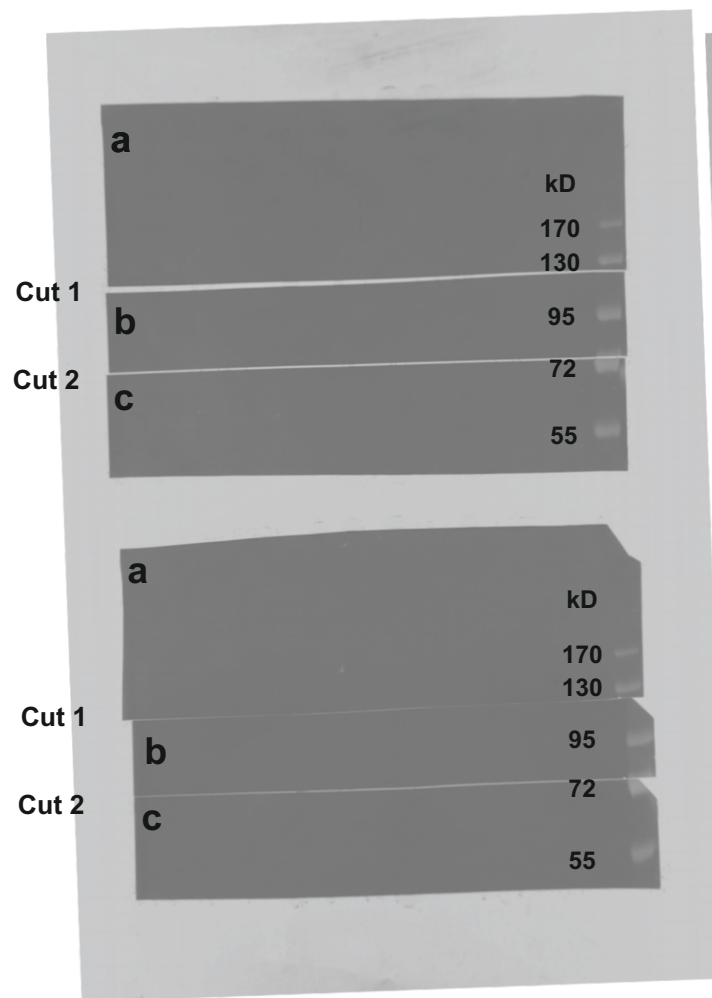

## Chemiluminescence detection image

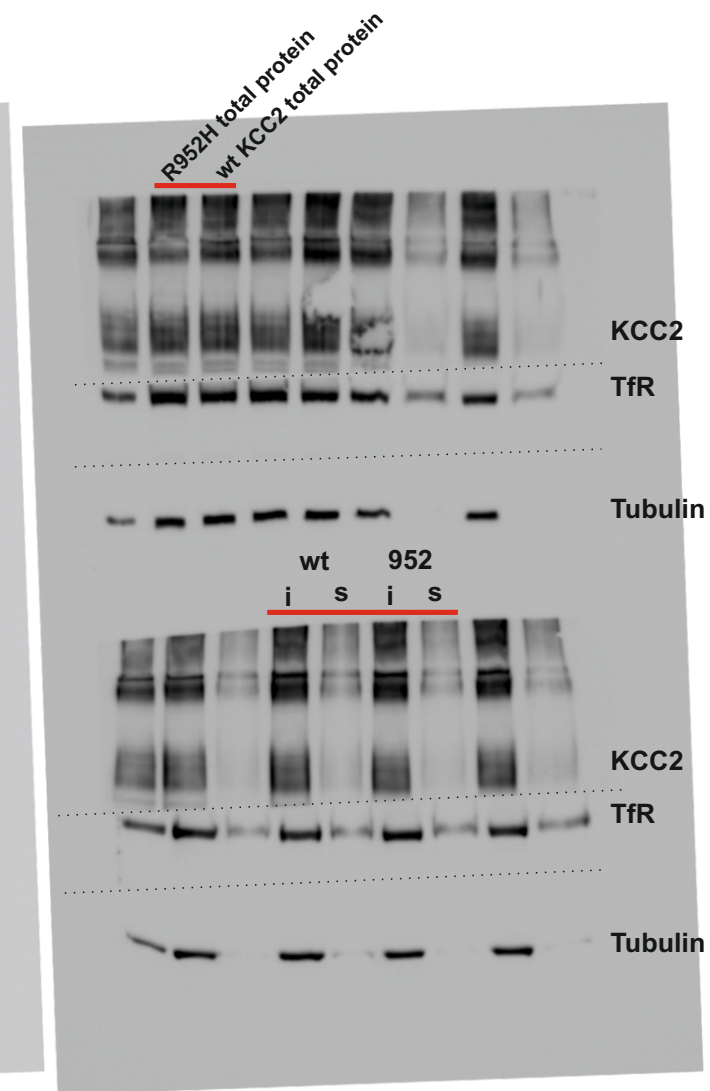

Supplement: embr0015-0723-sd3.pdf [file embr0015-0723-sd3.pdf]
